# Supplementary material for: “Green” anionic wormlike micelles induced by choline
Source: Royal Society of Chemistry journal article supplement (doi:10.1039/c2ra20136d), 2012-01-01
Supplement: c2ra20136d.pdf [file c2ra20136d.pdf]

Electronic Supplementary Information (ESI)

## “Green” anionic wormlike micelles induced by choline

Yixiu Han,<sup>bc</sup> Zonglin Chu,<sup>b</sup> Huanquan Sun,<sup>a</sup> Zhenquan Li,<sup>a</sup> and Yujun Feng<sup>\*ab</sup>

<sup>a</sup> EOR Laboratory, Research Institute of Geological Sciences, Shengli Oilfield Company of Sinopec, Dongying 257015, P. R. China

<sup>b</sup> Chengdu Institute of Organic Chemistry, Chinese Academy of Sciences, Chengdu 610041, P. R. China. Fax: + 86 (28) 8523 6874; Tel: + 86 (28) 8523 6874; E-mail: yjfeng@cioc.ac.cn

<sup>c</sup> The Second Research Institute of Civil Aviation Administration of China (CAAC), Chengdu 610041, P. R. China

### Phase behavior

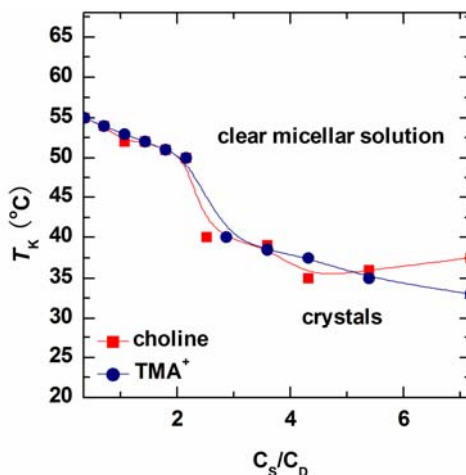

**Figure S1.** Krafft temperature plotted as a function of molar ratio of organic salt to NaOEr,  $C_S/C_D$ , where  $C_D$  is fixed at 1 wt%.

NaOEr is hardly soluble in pure water at room temperature, which impeded its practical applications. So it is necessary to decrease its Krafft point ( $T_K$ ), i.e., the temperature at which 1 wt% surfactant is solubilized,<sup>1</sup> to satisfy the demand of researches and potential applications. The plots of  $T_K$  values against molar ratios of  $C_S/C_D$  were shown in Figure S1. With increasing  $C_S/C_D$ ,  $T_K$  decreases monotonously and these two counterions show similar ability to enhance the solubility of NaOEr, which is consistent with previous report.<sup>2</sup>

### Additional Figures for the effect of hydrotrope concentration on rheological behaviors

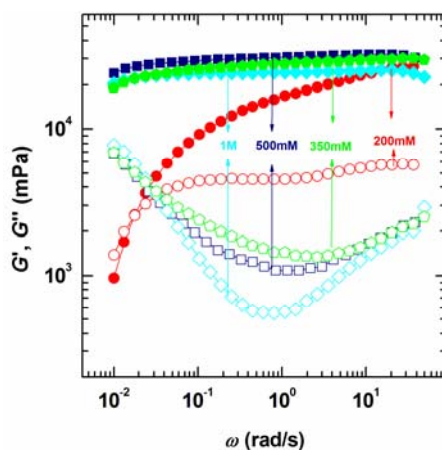

**Figure S2.** Additional dynamical rheogram for “NaOEr–choline” system with varied choline concentration. NaOEr concentration is held constant at 100 mM. All the measurements are carried out at 50 °C.

Electronic Supplementary Information (ESI)

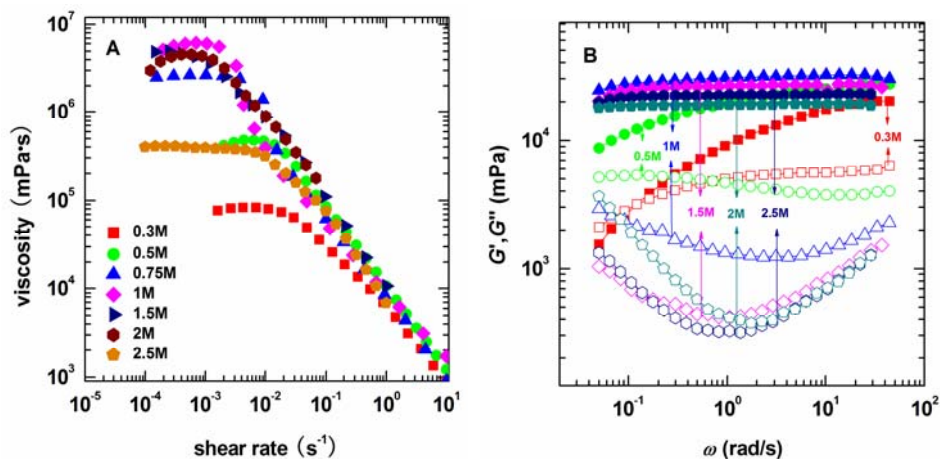

**Figure S3.** Additional dynamical rheogram for “NaOEr–TMA<sup>+</sup>” system with varied TMA<sup>+</sup> concentration. (A) steady rheology; (B) dynamic rheology. NaOEr concentration is held constant at 100 mM. All the measurements are carried out at 50 °C.

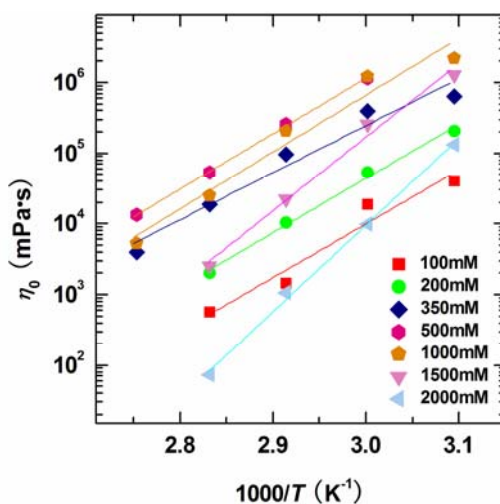

**Figure S4.** Arrhenius plots of  $\eta_0$  vs  $1/T$  at different choline concentrations.

Figure S4 illustrates the dependence of  $\eta_0$  in semi-log plots versus the reciprocal of the absolute temperature at different choline concentrations. These plots all fall on straight lines and demonstrate that  $\eta_0$  obeys Arrhenius behavior. From the slopes of these plots the activation energies were estimated.

**Additional Figures for effect of temperature on rheological behaviors.**

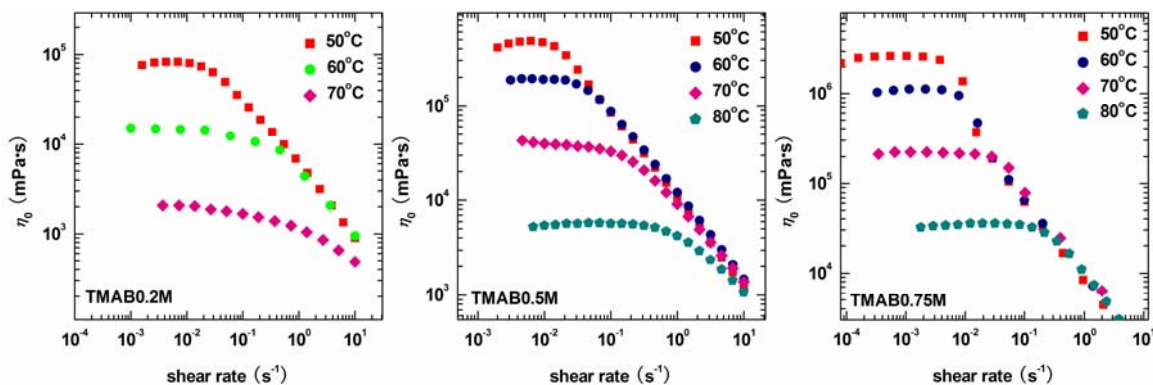

## Electronic Supplementary Information (ESI)

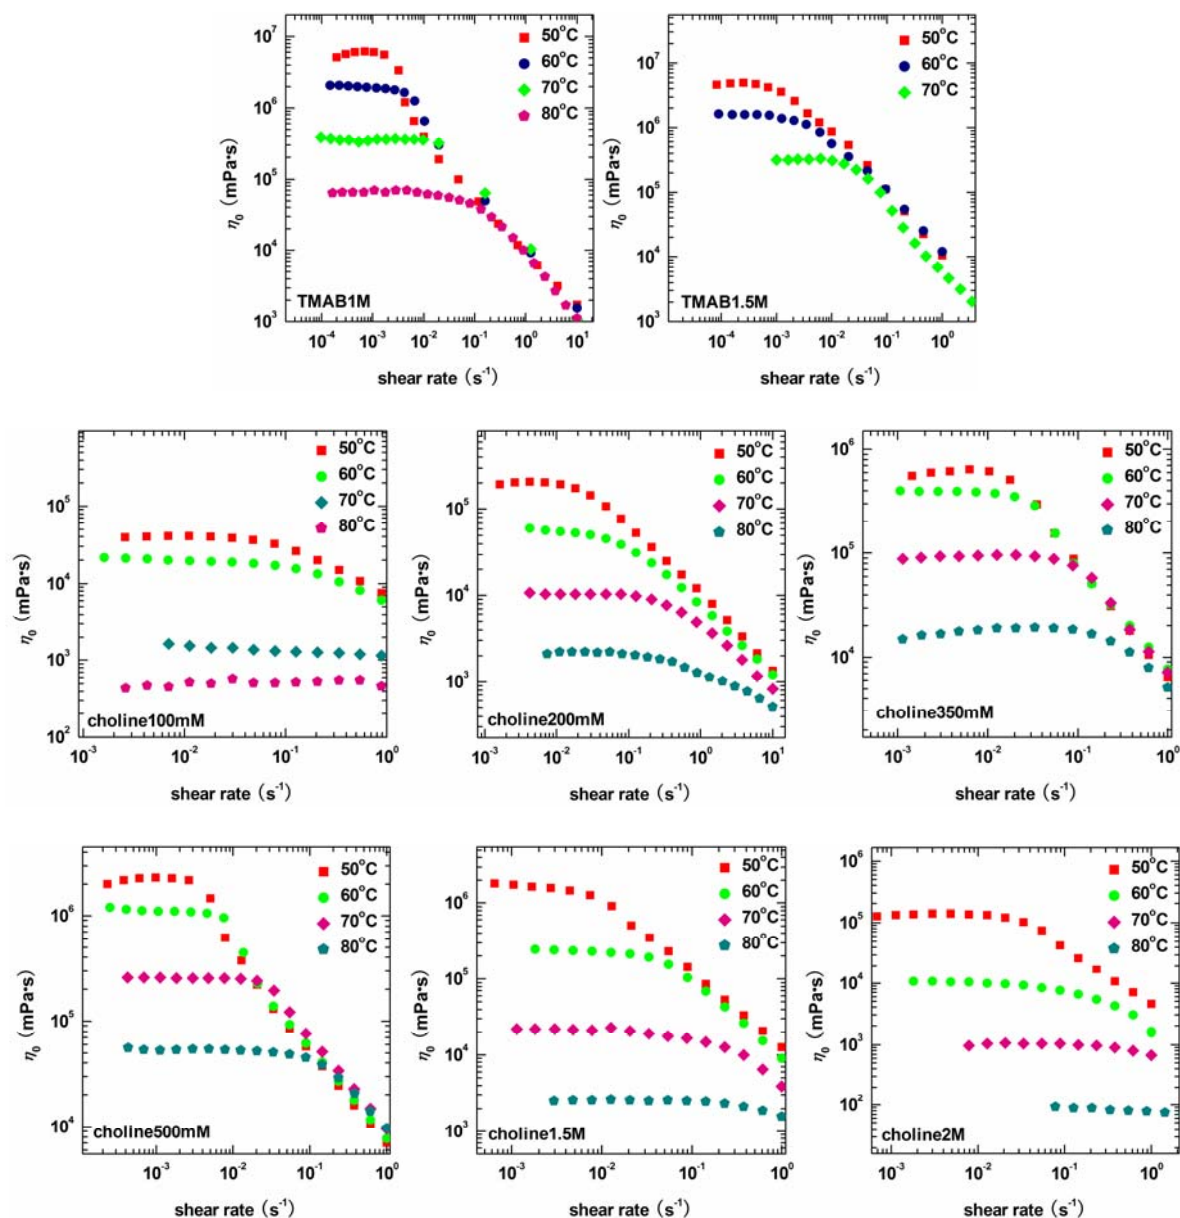

**Figure S5.** The effect of temperature on viscosity at different counterion concentrations. All the measurements are carried out at 50 °C.

## References

1. R. G. Laughlin. The aqueous phase behavior of surfactants. Academic Press, San Diego, 1994.
2. R. Klein, D. Touraud and W. Kunz, Green Chem., 2008, **10**, 433–435.
